# Supplementary material
Source: Springer Nature journal article supplement (https://www.springermedizin.de/resource/supplementary/13075_2010_3019_MOESM3_ESM.pdf/9693354)

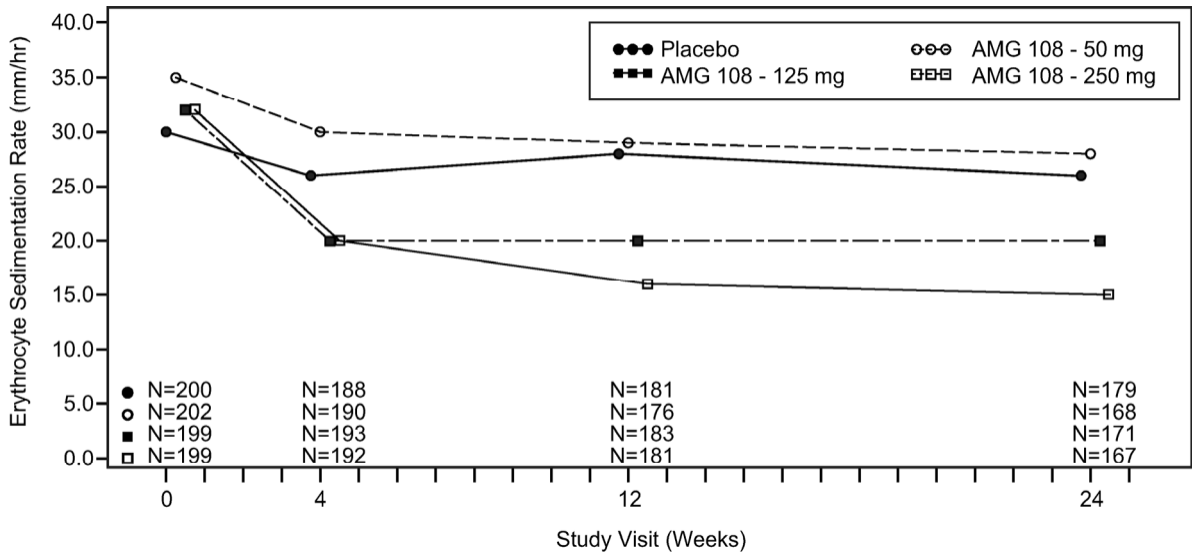

Supplement: MOESM3 [file 9693354]
